1 Network Architecture and Mutational Sensitivity of the *C. elegans* Metabolome

2

3 Lindsay M. Johnson<sup>1\*</sup>, Luke M. Chandler<sup>2\*</sup>, Sarah K. Davies<sup>3</sup> and Charles F. Baer<sup>1,2</sup>

4

5 1 – Department of Biology, University of Florida, Gainesville, FL

6 2 – University of Florida Genetics Institute

7 3 - Faculty of Medicine, Department of Surgery & Cancer, Imperial College, London

8 \* - these authors contributed equally

9 Email: [lindsaymjohnson@ufl.edu](mailto:lindsaymjohnson@ufl.edu); [lukemchandler@ufl.edu](mailto:lukemchandler@ufl.edu); sarah.davies1@imperial.ed.uk

10 Correspondence to:

11 Charles F. Baer

12 Department of Biology

13 University of Florida

14 P. O. Box 118525

15 Gainesville, FL 32611-8525 USA

16 Email: [cbaer@ufl.edu](mailto:cbaer@ufl.edu)

17

18 Keywords: metabolic network, mutation accumulation, mutational correlation, mutational

19 variance, network centrality

20

21 **Declarations:**

- 22 ○ Ethics approval and consent to participate: Not applicable
- 23 ○ Consent for publication: Not applicable
- 24 ○ Availability of data and material:
- 25 ○ Metabolomics data (normalized metabolite concentrations) are archived in Dryad
- 26 (<http://dx.doi.org/10.5061/dryad.2dn09/1>).
- 27 ○ Data used to reconstruct the metabolic networks are included in Supplementary
- 28 Appendix A1.
- 29 ○ Competing interests: The authors declare no competing interests.
- 30 ○ Funding: Funding was provided by NIH grant R01GM107227 to CFB and E. C. Andersen.
- 31 The funding agency had no role in the design of the study and the collection, analysis, and
- 32 interpretation of the data or in the writing of the manuscript.
- 33 ○ Authors' contributions. LMJ and LMC collected and analyzed data in the network
- 34 reconstruction and contributed to writing the manuscript. SKD collected and analyzed the
- 35 GC-MS data. CFB analyzed data and wrote the manuscript. All authors read and approved
- 36 the final manuscript.
- 37 ○ Acknowledgements: This work was initially conceived by Armand Leroi and Jake Bundy.
- 38 We thank Art Edison, Dan Hahn, Tom Hladish and especially Hongwu Ma for their
- 39 generosity and very helpful advice.

40

41 List of Figures and Tables

42 **Figure 1.** (a) Design of an MA experiment (b) Fitness, Trait means vs. gen(MA) and VG vs.  
43 gen(MA) (c) Cov(G) vs. gen(MA)

44 **Figure 2.** Metabolic Network

45 **Figure 3.** Depiction of  $k$ -core

46

47 **Table 1.** List of definitions of network statistics and mutational parameters

48 **Table 2.** Correlations between network statistics and mutational parameters

49

50 **Supplementary Figure S1.** Parametric bootstrap distributions of random correlations between  
51 (a)  $r_M$  and shortest path length in the directed network, (b)  $|r_M|$  and shortest path length, (c)  $r_M$   
52 and shortest path length in the undirected network (i.e., shorter of the two path lengths between  
53 metabolites  $i$  and  $j$  in the directed network)

54 **Supplementary Figure S2.** Twelve distributions of  $r_M$  with six randomly chosen covariates.

55

56 **Supplementary Table S1.** Network and mutational parameters of metabolites. (Excel)

57 **Supplementary Table S2.** Table of discrepancies between MZ and YW methods (Word)

58 **Supplementary Table S3.** Mutational and environmental correlations (Excel)

59 **Supplementary Table S4.** Shortest network path lengths (Excel)

60 **Supplementary Appendix A1.** Metabolic network data (Excel)

61

62

63 **Abstract**

64 Background: A fundamental issue in evolutionary systems biology is understanding the  
65 relationship between the topological architecture of a biological network, such as a metabolic  
66 network, and the evolution of the network. The rate at which an element in a metabolic network  
67 accumulates genetic variation via new mutations depends on both the size of the mutational  
68 target it presents and its robustness to mutational perturbation. Quantifying the relationship  
69 between topological properties of network elements and the mutability of those elements will  
70 facilitate understanding the variation in and evolution of networks at the level of populations and  
71 higher taxa.

72  
73 Results: We report an investigation into the relationship between two topological properties of  
74 29 metabolites in the *C. elegans* metabolic network and the sensitivity of those metabolites to  
75 the cumulative effects of spontaneous mutation. The relationship between several measures of  
76 network centrality and sensitivity to mutation is weak, but point estimates of the correlation  
77 between network centrality and mutational variance are positive, with only one exception. There  
78 is a marginally significant correlation between core number and mutational heritability. There is  
79 a small but significant negative correlation between the shortest path length between a pair of  
80 metabolites and the mutational correlation between those metabolites.

81  
82 Conclusions: Positive association between the centrality of a metabolite and its mutational  
83 heritability is consistent with centrally-positioned metabolites presenting a larger mutational  
84 target than peripheral ones, and is inconsistent with centrality conferring mutational robustness,  
85 at least *in toto*. The weakness of the correlation between shortest path length and the  
86 mutational correlation between pairs of metabolites suggests that network locality is an  
87 important but not overwhelming factor governing mutational pleiotropy. These findings provide

88 necessary background against which the effects of other evolutionary forces, most importantly  
89 natural selection, can be interpreted.

90

91 **Introduction:**

92           The set of chemical reactions that constitute organismal metabolism is often represented  
93 as a network of interacting components, in which individual metabolites are the nodes in the  
94 network and the chemical reactions of metabolism are the edges linking the nodes [1].  
95 Representation of a complex biological process such as metabolism as a network is  
96 conceptually powerful because it offers a convenient and familiar way of visualizing the system,  
97 as well as a well-developed mathematical framework for analysis.

98           If the representation of a biological system as a network is to be useful as more than a  
99 metaphor, it must have predictive power [2]. Metabolic networks have been investigated in the  
100 context of evolution, toward a variety of ends. Many studies have compared empirical metabolic  
101 networks to various random networks, with the goal of inferring adaptive features of network  
102 architecture (e.g., [1, 3-7]. Other studies have addressed the relationship between network-  
103 level properties of individual elements of the network (e.g., node degree, centrality) and  
104 properties such as rates of protein evolution [8, 9] and within-species polymorphism [10].

105           One fundamental evolutionary process that remains essentially unexplored with respect  
106 to metabolic networks is mutation. Mutation is the ultimate source of genetic variation, and as  
107 such provides the raw material for evolution: the greater the input of genetic variation by  
108 mutation, the greater the capacity for evolution. However, in a well-adapted population, most  
109 mutations are at least slightly deleterious. At equilibrium, the standing genetic variation in a  
110 population represents a balance between the input of new mutations that increase genetic  
111 variation and reduce fitness, and natural selection, which removes deleterious variants and  
112 thereby increases fitness. Because genetic variation is jointly governed by mutation and  
113 selection, understanding the evolution of any biological entity, such as a metabolic network,  
114 requires an independent accounting of the effects of mutation and selection.

115           The cumulative effects of spontaneous mutations can be assessed in the near absence  
116 of natural selection by means of a mutation accumulation (MA) experiment (Figure 1). Selection

117 becomes ineffective relative to random genetic drift in small populations, and mutations with  
118 effects on fitness smaller than about the reciprocal of the population size (technically, the  
119 genetic effective population size,  $N_e$ ) will be essentially invisible to natural selection [11]. An MA  
120 experiment minimizes the efficacy of selection by minimizing  $N_e$ , thereby allowing all but the  
121 most strongly deleterious mutations to evolve as if they are invisible to selection [12].

122 Our primary interest is in the relationship between the centrality of a metabolite in the  
123 network and the sensitivity of that metabolite to mutation. Roughly speaking, the centrality of a  
124 node in a network quantifies some measure of the importance of the node in the network [13].  
125 A generic property of empirical networks, including metabolic networks, is that they are  
126 (approximately) scale-free; scale-free networks are characterized by a topology with a few "hub"  
127 nodes (high centrality) and many peripheral nodes (low centrality; [1]). Scale-free networks are  
128 more robust to random perturbation than are randomly-connected networks [14].

129 Mutation is an important source of perturbation to biological systems, and much effort  
130 has gone into theoretical and empirical characterization of the conditions under which  
131 mutational robustness will evolve [15-17]. Mutational robustness can be assessed in two basic  
132 ways: top-down, in which a known element of the system is mutated and the downstream  
133 effects of the mutation quantified, or bottom-up, in which mutations are introduced at random,  
134 either spontaneously or by mutagenesis, and the downstream effects quantified. Top-down  
135 experiments are straightforward to interpret: the greater the effects of the mutation (e.g., on a  
136 phenotype of interest), the less robust the system. However, the scope of inference is limited to  
137 the types of mutations introduced by the investigator (which in practice are almost always gene  
138 knockouts), and provide limited insight into natural variation in mutational robustness.

139 Bottom-up approaches, in which mutations are allowed to accumulate at random,  
140 provide insight into the evolution of a system as it actually exists in nature: all else equal, a  
141 system, or element of a system ("trait"), that is robust to the effects of mutation will accumulate  
142 less genetic variance under MA conditions than one that is not robust (Figure 1b; [18]).

143 However, the inference is not straightforward, because all else may not be equal: different  
144 systems or traits may present different mutational targets (roughly speaking, the number of sites  
145 in the genome that potentially affect a trait; [19]).

146 Ultimately, disentangling the evolutionary relationship between network architecture,  
147 mutational robustness, and mutational target is an empirical enterprise, specific to the system of  
148 interest. As a first step, it is necessary to establish the relationship between network  
149 architecture (e.g., topology) and the rate of accumulation of genetic variance under MA  
150 conditions. If a general relationship emerges, targeted top-down experiments can then be  
151 employed to dissect the relationship in more mechanistic detail.

152 In addition to the relationship between metabolite centrality and mutational variance, we  
153 are also interested in the relationship between network topology and the mutational correlation  
154 ( $r_M$ ) between pairs of metabolites (Figure 1c). In principle, mutational correlations reflect  
155 pleiotropic relationships between genes underlying pairs of traits (but see below for caveats;  
156 [20]). Genetic networks are often modular [21], consisting of groups of genes (modules) within  
157 which pleiotropy is strong and between which pleiotropy is weak [22]. Genetic modularity  
158 implies that mutational correlations will be negatively correlated with the length of the shortest  
159 path between network elements. However, it is possible that the network of gene interactions  
160 underlying metabolic regulation is not tightly correlated with the metabolic network itself, e.g., if  
161 *trans* acting regulation predominates.

162 Here we report results from a long-term MA experiment in the nematode *Caenorhabditis*  
163 *elegans*, in which replicate MA lines derived from a genetically homogeneous common ancestor  
164 (G0) were allowed to evolve under minimally effective selection ( $N_e \approx 1$ ) for approximately 250  
165 generations (Figure 1a). We previously reported estimates from these MA lines of two key  
166 quantitative genetic parameters by which the cumulative effects of mutation can be quantified:  
167 the per-generation change in the trait mean (the mutational bias,  $\Delta M$ ) and the per-generation  
168 increase in genetic variation (the mutational variance,  $V_M$ ) for the standing pools of 29



169 metabolites [23]; Supplementary Table S1. In this report, we interpret those results, and new  
170 estimates of mutational correlations ( $r_M$ ), in the context of the topology of the *C. elegans*  
171 metabolic network.

172

## 173 **Results and Discussion**

174 Representation of the Metabolic Network – The metabolic network of *C. elegans* was estimated  
175 in two ways: (i) by the method of Ma and Zeng [24; MZ], and (ii) by the method of Yilmaz and  
176 Walhout [25; YW]. Details of the network construction are given in section I of the Methods;  
177 data are presented in Supplementary Appendix A1. For the set of metabolites included (see  
178 Methods), MZ and YW give nearly identical results. In the few cases in which there is a  
179 discrepancy (~1%; Supplementary Table S2), we use the MZ network, for reasons we explain in  
180 the Methods. The resulting network is a directed graph including 646 metabolites, with 1203  
181 reactions connecting nearly all metabolites (Figure 2).

182 Properties of networks can be quantified in many ways, and different measures of  
183 centrality capture different features of network importance (Table 1). We did not have a strong  
184 prior hypothesis about which specific measure(s) of centrality would prove most informative in  
185 terms of a relationship with  $\Delta M$  and/or  $V_M$ . Therefore, we assessed the relationship between  
186 mutational properties and several measures of network centrality: betweenness, closeness, and  
187 degree centrality, in- and out-degree, and core number (depicted in Figure 3). These  
188 parameters are all positively correlated. Definitions of the parameters are given in Table 1;  
189 correlations between the parameters are included in Table 2. For each of the six parameters,  
190 we calculated Spearman's correlation  $\rho$  between mutational statistics and the network  
191 parameter associated with the metabolite. The strict experiment-wide 5% significance level for  
192 these correlations is approximately  $P < 0.002$  ( $\alpha = 0.05 / [6 \text{ network parameters} \times 4 \text{ mutational}$   
193  $\text{parameters}]$ ).

194 Mutational Parameters – Details of the MA experiment are reported in [26] and outlined in  
195 section II of the Methods. The experimental protocol by which metabolite concentrations were  
196 measured is reported in [23] and outlined in section III of the Methods; data are archived in  
197 Dryad at <http://dx.doi.org/10.5061/dryad.2dn09/1>. For each of the 29 metabolites, the  
198 cumulative effects of mutation are summarized by the mutational bias ( $\Delta M$ ), and the mutational  
199 variance ( $V_M$ ). For a trait  $z$ ,  $\Delta M_z = \mu_G \alpha_z$ , where  $\mu_G$  is the genomic mutation rate and  $\alpha_z$  is the  
200 average effect of a mutation on the trait;  $V_M = \mu_G \alpha_z^2$  [27, p. 329]. Details of the estimation of  
201 mutational parameters are given in section IV of the Methods.

202 Comparisons of variation among traits or groups require that the variance be measured  
203 on a common scale.  $V_M$  is commonly scaled either relative to the trait mean, in which case  $V_M$  is  
204 the squared coefficient of variation and is often designated  $I_M$ , or relative to the residual  
205 variance,  $V_E$ ;  $V_M/V_E$  is the mutational heritability,  $h_M^2$ .  $I_M$  and  $h_M^2$  have different statistical  
206 properties and evolutionary interpretations [28], so we report both.  $I_M$  and  $I_E$  are standardized  
207 relative to the mean of the MA lines.

208 Network centrality and sensitivity to mutation –

209 (i) *Mutational bias ( $\Delta M$ )*. It is reasonable to expect that metabolite concentrations are under  
210 some degree of stabilizing selection, in which case sufficiently large changes in either direction  
211 are deleterious. Neither  $\Delta M$  nor  $|\Delta M|$  showed a clear association with any measure of network  
212 centrality (Table 1). Four metabolites (adenosine, nicotinamide, succinic acid, and xanthine)  
213 have atypically large, positive  $\Delta M$  (Supplementary Table S1), among the largest values of  $\Delta M$   
214 ever reported for any trait [23], and those four metabolites all have core number  $k = 2$  ( $P = 0.03$ ,  
215 exact probability). However, the large  $\Delta M$  for those traits is probably an artifact of scaling,  
216 because those four metabolites had very low concentrations (near zero) in the G0 ancestor.  
217 (ii) *Mutational variance ( $V_M$ )*. We report  $V_M$  scaled in two ways: relative to the trait mean ( $I_M$ ) and  
218 relative to the residual ("environmental") variance,  $h_M^2$ . Of the twelve correlations (two measures  
219 of mutational variance  $\times$  six measures of centrality), the correlation with betweenness centrality

220 is very slightly negative; the rest are positive (Table 2), although only the correlation between  
221 core number and  $h_M^2$  approaches statistical significance at the experiment-wide 5% level  
222 ( $\rho=0.48$ ,  $P<0.008$ ). The 29 metabolites in our data set have core number of either one or two  
223 (the maximum core number of any metabolite in the network is two). Mean  $h_M^2$  of metabolites of  
224 core number = 2 is approximately 2.5X greater than that of metabolites of core number = 1  
225 (0.002 vs. 0.0008). To put that result in context, the average  $h_M^2$  for a wide variety of traits in a  
226 wide variety of organisms is on the order of 0.001 [28].

227 Core number is a discrete interval variable, whereas the other measures of network  
228 centrality are continuous variables. As an alternative analysis, we performed ordinary linear  
229 regression (equivalent to analysis of variance in the case of a binary categorical variable) of  
230  $\log(h_M^2)$  on core number; the results are similar to the rank correlation ( $F_{1,27} = 10.53$ ,  $P<0.0032$ ;  
231 Pearson's  $r = 0.53$ ).

232 The conservative interpretation of these results is that there is no relationship between  
233 network centrality and any measure of mutational sensitivity. If so, there are various possible  
234 explanations. For example, it may be that mutational target and mutational robustness  
235 effectively cancel each other out. More worryingly, it may be that the representation of the *C.*  
236 *elegans* metabolic network used here misrepresents the network as it actually exists *in vivo*.  
237 The topology of the dynamic metabolic network of the bacterium *E. coli* varies depending on the  
238 environmental context [29], and it seems intuitive that the greater spatiotemporal complexity  
239 inherent to a multicellular organism would exacerbate that problem. More mundanely, it may be  
240 that the sampling variance associated with the relatively small number of mutations and MA  
241 lines drowns out any signal of an association. Or it may be that there simply is no functional  
242 relationship between the centrality of a metabolite in a network and its sensitivity to mutation.

243 The liberal interpretation is that the near-significant correlation of mutational heritability  
244 with core number represents a weak signal emerging from a small sample from a noisy system.

245 Quantifying centrality in terms of core number is analogous to categorizing a set of size  
246 measurements into "small" and "large": power is increased, at the cost of losing the ability to  
247 discriminate between more subtle differences.

248 The raw mutational variance,  $V_M$ , appears in the numerator of both  $h_M^2$  and  $I_M$ ; the  
249 difference lies in the denominator, which is the residual variance  $V_E$  for  $h_M^2$  and the square of the  
250 trait mean for  $I_M$ . For some replicates of some metabolites, estimated metabolite concentrations  
251 were atypically low and near zero;  $I_M$  is more sensitive to low outliers than is  $h_M^2$ . However, the  
252 correlation between  $I_M$  and the trait mean is small ( $r = -0.11$ ) and not significantly different from  
253 zero. Alternatively, it is possible that  $V_M$  does not vary consistently with metabolite centrality,  
254 but that metabolites with low centrality (core number = 1) are more susceptible to random  
255 microenvironmental variation ("noise") than are metabolites with high centrality (core number =  
256 2), in which case  $V_E$  would be greater for metabolites with low centrality and  $h_M^2$  would be lower.  
257 Unfortunately, the variance is correlated with the trait mean, so the least biased way to address  
258 that question is by comparing the residual squared coefficients of variation,  $I_E$ . There is no hint  
259 of correlation between core number and  $I_E$  ( $\rho=0.025$ ,  $P>0.89$ ; Table 2), and  $I_E$  is uncorrelated  
260 with the trait mean ( $r = -0.12$ ,  $P>0.54$ ), so the association between  $h_M^2$  and core number cannot  
261 obviously be attributed to differential sensitivity to random noise.

262 The relationship between mutational correlation ( $r_M$ ) and shortest path length – In an MA  
263 experiment, the cumulative effects of mutations on a pair of traits  $i$  and  $j$  may covary for two,  
264 nonexclusive reasons [20]. More interestingly, individual mutations may have consistently  
265 pleiotropic effects, such that mutations that affect trait  $i$  also affect trait  $j$  in a consistent way.  
266 Less interestingly, but unavoidably, individual MA lines will have accumulated different numbers  
267 of mutations, and if mutations have consistently directional effects, as would be expected for  
268 traits correlated with fitness, lines with more mutations will have more extreme trait values than  
269 lines with fewer mutations, even in the absence of consistent pleiotropy. Estes et al. [20]

270 simulated the sampling process in *C. elegans* MA lines with mutational properties derived from  
271 empirical estimates from a variety of traits and concluded that sampling is not likely to lead to  
272 large absolute mutational correlations in the absence of consistent pleiotropy ( $|r_M| \leq 0.25$ ).

273 Ideally, we would like to estimate the full mutational (co)variance matrix,  $\mathbf{M}$ , from the joint  
274 estimate of the among-line (co)variance matrix. However, with 25 traits, there are  $(25 \times 26)/2 =$   
275 325 covariances, and with only 43 MA lines, there is insufficient information to jointly estimate  
276 the restricted maximum likelihood of the full  $\mathbf{M}$  matrix. To proceed, we calculated mutational  
277 correlations from pairwise REML estimates of the among-line (co)variances, i.e.,  $r_M =$   
278  $\frac{COV_L(X,Y)}{\sqrt{VAR_L(X)VAR_L(Y)}}$  [30, 31]. Pairwise estimates of  $r_M$  are shown in Supplementary Table S3. To  
279 assess the extent to which the pairwise correlations are sensitive to the underlying covariance  
280 structure, we devised a heuristic bootstrap analysis. For a random subset of 12 of the 300 pairs  
281 of traits, we randomly sampled six of the remaining 23 traits without replacement and estimated  
282  $r_M$  between the two focal traits from the joint REML among-line (co)variance matrix. For each of  
283 the 12 pairs of focal traits, we repeated the analysis 100 times.

284 There is a technical caveat to the preceding bootstrap analysis. Resampling statistics  
285 are predicated on the assumption that the variables are exchangeable [32], which metabolites  
286 are not. For that reason, we do not present confidence intervals on the resampled correlations,  
287 only the distributions. However, we believe that the analysis provides a meaningful heuristic by  
288 which the sensitivity of the pairwise correlations to the underlying covariance structure can be  
289 assessed.

290 Distributions of resampled correlations are shown in Supplementary Figure S2. In every  
291 case the point estimate of  $r_M$  falls on the mode of the distribution of resampled correlations, and  
292 in 11 of the 12 cases, the median of the resampled distribution is very close to the point  
293 estimate of  $r_M$ . However, in six of the 12 cases, some fraction of the resampled distribution falls  
294 outside two standard errors of the point estimate. The most important point that the resampling

295 analysis reveals is this: given that 29 metabolites encompass only a small fraction of the total  
296 metabolome of *C. elegans* (<5%), even had we been able to estimate the joint likelihood of the  
297 full  $29 \times 30/2$   $M$ -matrix, the true covariance relationships among those 29 metabolites could  
298 conceivably be quite different from those estimated from the data.

299 Correlations are properties of pairs of variables, so we expect *a priori* that network  
300 parameters that apply to pairs of elements are more likely to contain information about the  
301 mutational correlation between a pair of metabolites than will the pairwise average of a  
302 parameter that applies to individual elements of a network. The shortest path length is the  
303 simplest network property that describes the relationship between two nodes, although since the  
304 metabolic network is directed, the shortest path from element  $i$  to element  $j$  is not necessarily  
305 the same as the shortest path from  $j$  to  $i$ . For each pair of metabolites  $i$  and  $j$ , we calculated the  
306 shortest path length from  $i$  to  $j$  and from  $j$  to  $i$ , without repeated walks (Supplementary Table S4).  
307 We then calculated Spearman's correlation  $\rho$  between the mutational correlation  $r_M$  and the  
308 shortest path length.

309 Statistical assessment of the correlation between mutational correlations ( $r_M$ ) and  
310 shortest path length presents a problem of nonindependence, for two reasons. First, all  
311 correlations including the same variable are non-independent. Second, even though the  
312 mutational correlation between metabolites  $i$  and  $j$  is the same as the correlation between  $j$  and  
313  $i$ , the shortest path lengths need not be the same, and moreover, the path from  $i$  to  $j$  may exist  
314 whereas the path from  $j$  to  $i$  may not. To account for non-independence of the data, we devised  
315 a parametric bootstrap procedure; details are given in section V of the Methods. Three  
316 metabolites (L-tryptophan, L-lysine, and Pantothenate) lie outside of the great strong component  
317 of the network [33] and are omitted from the analysis.

318 There is a weak, but significant, negative correlation between  $r_M$  and the shortest path  
319 length between the two metabolites ( $\rho = -0.128$ , two-tailed  $P < 0.03$ ; Supplementary Figure S1a),  
320 whereas  $|r_M|$  is not significantly correlated with shortest path length ( $\rho = -0.0058$ , two-tailed

321  $P > 0.45$ ; Supplementary Figure S1b). The correlation between  $r_M$  and the shortest path in the  
322 undirected network is similar to the correlation between  $r_M$  and the shortest path in the directed  
323 network ( $\rho = -0.105$ , two-tailed  $P > 0.10$ ; Supplementary Figure S1c).

324 An intuitive possible cause of the weak negative association between shortest path  
325 length and mutational correlation would be if a mutation that perturbs a metabolic pathway  
326 toward the beginning of the pathway has effects that propagate downstream in the same  
327 pathway, but the effect of the perturbation attenuates. The attenuation could be due either to  
328 random noise or to the effects of other inputs into the pathway downstream from the  
329 perturbation (or both). The net effect would be a characteristic pathway length past which the  
330 mutational effects on two metabolites are uncorrelated, leading to an overall negative correlation  
331 between  $r_M$  and path length. The finding that the correlations between  $r_M$  and the shortest path  
332 length in the directed and undirected network are very similar reinforces that conclusion. The  
333 negative correlation between  $r_M$  and shortest path length is reminiscent of a finding from  
334 Arabidopsis, in which sets of metabolites significantly altered by single random gene knockouts  
335 are closer in the global metabolic network than expected by chance [34].

### 336 Conclusions and Future Directions

337 The proximate goal of this study was to find out if there are topological properties of the *C.*  
338 *elegans* metabolic network (node centrality, shortest path length) that are correlated with a set  
339 of statistical descriptions of the cumulative effects of spontaneous mutations ( $\Delta M$ ,  $V_M$ ,  $r_M$ ).

340 Ultimately, we hope that a deeper understanding of those mathematical relationships will shed  
341 light on the mechanistic biology of the organism. Bearing in mind the statistical fragility of the  
342 results, we conclude:

343 *(i) Network centrality may be associated with mutational sensitivity ( $V_M$ ), it is not associated with*  
344 *mutational robustness ( $1/V_M$ ).* If the liberal interpretation of the results is true, the most plausible  
345 explanation is that metabolites that are central in the network present a larger mutational target  
346 than do metabolites that peripherally located. However, although  $1/V_M$  is a meaningful measure

347 of mutational robustness [35], it does not necessarily follow that highly-connected metabolites  
348 are therefore more robust to the effects of *individual* mutations [19, 36].

349 *(ii) Pleiotropic effects of mutations affecting the metabolome are predominantly local, as*  
350 evidenced by the significant negative correlation between shortest path length between a pair of  
351 metabolites and the mutational correlation,  $r_M$ , between that pair of metabolites. That result is  
352 not surprising in hindsight, but the weakness of the correlation suggests that there are other  
353 important factors that underlie pleiotropy beyond network proximity.

354 To advance understanding of the mutability of the *C. elegans* metabolic network, three  
355 things are needed. First, it will be important to cover a larger fraction of the metabolic network.  
356 Untargeted mass spectrometry of cultures of *C. elegans* reveals many thousands of features  
357 (Art Edison, personal communication); 29 metabolites are only the tip of a large iceberg. For  
358 example, our intuition leads us to believe that the mutability of a metabolite will depend more on  
359 its in-degree (mathematically, the number of edges leading into a node in a directed graph;  
360 biochemically, the number of reactions in which the metabolite is a product) than its out-degree.  
361 The point-estimate of the correlation of  $h_M^2$  with in-degree is twice that of the correlation of  $h_M^2$   
362 with out-degree (Table 2), although the difference is not statistically significant.

363 Second, to more precisely partition mutational (co)variance into within- and among-line  
364 components, more MA lines are needed. We estimate that each MA line carries about 80  
365 unique mutations (see Methods), thus the mutational (co)variance is the result of about 3500  
366 total mutations, distributed among 43 MA lines. The MA lines were a preexisting resource, and  
367 the sample size was predetermined. It is encouraging that we were able to detect significant  
368 mutational variance for 25/29 metabolites (Supplementary Table S1b), but only 14% (42/300) of  
369 pairwise mutational correlations are significantly different from zero at the experiment-wide 5%  
370 significance level, roughly corresponding to  $|r_M| > 0.5$  (Supplementary Table S3); 18 of the 42  
371 significant mutational correlations are not significantly different from  $|r_M| = 1$ . It remains  
372 uncertain how sensitive estimates of mutational correlations are to the underlying covariance



373 structure of the metabolome. It also remains to be seen if the mutability of specific features of  
374 metabolic networks are genotype or species-specific, and the extent to which mutability  
375 depends on environmental context.

376 Third, it will be important to quantify metabolites (static concentrations and fluxes) with  
377 more precision. The metabolite data analyzed in this study were collected from large cultures  
378 ( $n > 10,000$  individuals) of approximately age-synchronized worms, and were normalized relative  
379 to an external quantitation standard [23]. Ideally, one would like to characterize the  
380 metabolomes of single individuals, assayed at the identical stage of development. That is not  
381 yet practical with *C. elegans*, although it is possible to quantify hundreds of metabolites from a  
382 sample of 1000 individuals [37], and preliminary studies suggest it will soon be possible to  
383 reduce the number of individuals to 100 or even ten (M. Witting, personal communication).  
384 Minimizing the number of individuals in a sample is important for two reasons; (1) the smaller  
385 the sample, the easier it is to be certain the individuals are closely synchronized with respect to  
386 developmental stage, and (2) knowing the exact number of individuals in a sample makes  
387 normalization relative to an external standard more interpretable. Ideally, data would be  
388 normalized relative to both an external standard and an internal standard (e.g., total protein;  
389 [30]).

390 This study provides an initial assessment of the relationship between mutation and  
391 metabolic network architecture. To begin to uncover the relationship between metabolic  
392 architecture and natural selection, the next step is to repeat these analyses with respect to the  
393 standing genetic variation (VG). There is some reason to think that more centrally-positioned  
394 metabolites will be more evolutionarily constrained (i.e., under stronger purifying selection) than  
395 peripheral metabolites [8], in which case the ratio of the mutational variance to the standing  
396 genetic variance (VM/VG) will increase with increasing centrality.

397

398 **Methods and Materials:**

## 399 I. Metabolic Network:

400 The metabolic network of *C. elegans* was estimated in two ways: (i) by the static, purely  
401 graphical method of Ma and Zeng ([24]; updated at <http://www.ibiodesign.net/kneva/>; we refer to  
402 this method as MZ), and (ii) by the dynamical, flux-balance analysis (FBA) method of Yilmaz  
403 and Walhout ([25]; <http://wormflux.umassmed.edu/>; we refer to this method as YW).  
404 Subnetworks that do not contain at least one of the 29 metabolites were excluded from  
405 downstream analyses. The MZ method includes several *ad hoc* criteria for retaining or omitting  
406 specific metabolites from the analysis (criteria are listed on p. 272 of [24]). The set of reactions  
407 in the MZ and YW networks are approximately 99% congruent; in the few cases in which there  
408 is a discrepancy (listed in Supplementary Table S2), we chose to use the MZ network because  
409 we used the MZ criteria for categorizing currency metabolites (defined below).

410 To begin, the 29 metabolites of interest were identified and used as starting sites for the  
411 network. Next, all forward and reverse reactions stemming from the 29 metabolites were  
412 incorporated into the subnetwork until all reactions either looped back to the starting point or  
413 reached an endpoint. Currency metabolites were removed following the MZ criteria (a currency  
414 metabolite is roughly defined as a molecule such as water, proton, ATP, NADH, etc., that  
415 appears in a large fraction of metabolic reactions but is not itself an intermediate in an  
416 enzymatic pathway). Metabolic networks in which currency metabolites are included have much  
417 shorter paths than networks in which they are excluded. When currency metabolites are  
418 included in the network reported here, all shortest paths are reduced to no more than three  
419 steps, and most shortest paths consist of one or two steps. The biological relevance of path  
420 length when currency metabolites are included in the network is unclear [24].

421 A graphical representation of the network was constructed with the Pajek software  
422 package (<http://mrvar.fdv.uni-lj.si/pajek/>) and imported into the networkX Python package [38],  
423 which was used to generate network statistics. Proper importation from Pajek to networkX was  
424 verified by visual inspection.

## 425 II. Mutation Accumulation Lines

426 A full description of the construction and propagation of the mutation accumulation (MA) lines is  
427 given in [26]. Briefly, 100 replicate MA lines were initiated from a nearly-isogenic population of  
428 N2-strain *C. elegans* and propagated by single-hermaphrodite descent at four-day (one  
429 generation) intervals for approximately 250 generations. The long-term  $N_e$  of the MA lines is  
430 very close to one, which means that mutations with a selective effect less than about 25% are  
431 effectively neutral [39]. The common ancestor of the MA lines ("G0") was cryopreserved at the  
432 outset of the experiment; MA lines were cryopreserved upon completion of the MA phase of the  
433 experiment. Based on extensive whole-genome sequencing [40; A. Saxena and CFB, in prep],  
434 we estimate that each MA line carries about 80 mutant alleles in the homozygous state.

435 At the time the metabolomics experiments reported in [23] were initiated, approximately  
436 70 of the 100 MA lines remained extant, of which 43 ultimately provided sufficient material for  
437 Gas Chromatography/Mass Spectrometry (GC-MS). Each MA line was initially replicated five-  
438 fold, although not all replicates provided data of sufficient quality to include in subsequent  
439 analyses; the mean number of replicates included per MA line is 3.9 (range = 2 to 5). The G0  
440 ancestor was replicated nine times. However, the G0 ancestor was not subdivided into  
441 "pseudolines" [41], which means that inferences about mutational variances and covariances  
442 are necessarily predicated on the assumption that the among-line (co)variance of the ancestor  
443 is zero. Each replicate consisted of age-synchronized young-adult stage worms taken from a  
444 single 10 cm agar plate.

## 445 III. Metabolomics:

446 Details of the extraction and quantification of metabolites are given in [23]. Briefly, samples were  
447 analyzed using an Agilent 5975c quadrupole mass spectrometer with a 7890 gas  
448 chromatograph. Metabolites were identified by comparison of GC-MS features to the Fiehn  
449 Library [42] using the AMDIS deconvolution software [43], followed by reintegration of peaks  
450 using the GAVIN Matlab script [44]. Metabolites were quantified and normalized relative to an

451 external quantitation standard. 34 metabolites were identified, of which 29 were ultimately  
452 included in the analyses. Normalized metabolite data are archived in Dryad  
453 (<http://dx.doi.org/10.5061/dryad.2dn09>).

454 IV. Quantitative Genetic Analyses: There are three quantitative genetic parameters of interest:

455 (i) the per-generation proportional change in the trait mean, referred to as the mutational bias,  
456  $\Delta M$ ; (ii) the per-generation increase in the genetic variance, referred to as the mutational  
457 variance,  $V_M$ ; and (iii) the genetic correlation between the cumulative effects of mutations  
458 affecting pairs of traits, the mutational correlation,  $r_M$ . Details of the calculations of  $\Delta M$  and  $V_M$   
459 are reported in [23]; we reprise the basic calculations here.

460 (i) *Mutational bias ( $\Delta M$ )* – The mutational bias is the change in the trait mean due to the  
461 cumulative effects of all mutations accrued over one generation.  $\Delta M_z = \mu_G \alpha_z$ , where  $\mu_G$  is the per-  
462 genome mutation rate and  $\alpha_z$  is the average effect of a mutation on trait  $z$ , and is calculated as  
463  $\Delta M_z = \frac{\bar{z}_{MA} - \bar{z}_0}{t \bar{z}_0}$ , where  $\bar{z}_{MA}$  and  $\bar{z}_0$  represent the MA and ancestral (G0) trait means and  $t$  is the  
464 number of generations of MA.

465 (ii) *Mutational variance ( $V_M$ )* - The mutational variance is the increase in the genetic variance  
466 due to the cumulative effects of all mutations accrued over one generation.  $V_M = \mu_G \alpha_z^2$  and is  
467 calculated as  $V_M = \Delta V_L = \frac{V_{L,MA} - V_{L,G0}}{2t}$ , where  $V_{L,MA}$  is the variance among MA lines,  $V_{L,G0}$  is the  
468 among-line variance in the G0 ancestor, and  $t$  is the number of generations of MA [27, p. 330].  
469 In this study, we must assume that  $V_{L,G0} = 0$ .

470 (iii) *Mutational correlation,  $r_M$*  – Pairwise mutational correlations were calculated from the  
471 among-line components of (co)variance, which were estimated by REML as implemented in the  
472 in the MIXED procedure of SAS v. 9.4, following JD Fry [45]. Statistical significance of  
473 individual correlations was assessed by Z-test, with a global 5% significance criterion of  
474 approximately  $P < 0.000167$ .

475 V. Analysis of the correlation between mutational correlation ( $r_M$ ) and shortest path length -

476 Each off-diagonal element of the 24x24 mutational correlation matrix ( $r_{ij}=r_{ji}$ ) was associated with  
477 a random shortest path length sampled with probability equal to its frequency in the empirical  
478 distribution of shortest path lengths between all metabolites included in the analysis. Next, we  
479 calculated the Spearman's correlation  $\rho$  between  $r_M$  and the shortest path length. The  
480 procedure was repeated 10,000 times to generate an empirical distribution of  $\rho$ , to which the  
481 observed  $\rho$  can be compared. This comparison was done for the raw mutational correlation,  $r_M$ ,  
482 the absolute value,  $|r_M|$ , and between  $r_M$  and the shortest path length in the undirected network  
483 (i.e., the shorter of the two paths between metabolites  $i$  and  $j$ ).

484

485 **Acknowledgments –**

486 This work was initially conceived by Armand Leroi and Jake Bundy. We thank Art Edison, Dan  
487 Hahn, Tom Hladish, Marta Wayne, and especially Hongwu Ma for their generosity and very  
488 helpful advice. We thank the anonymous reviewers for their helpful comments. Support was  
489 provided by NIH grant R01GM107227 to CFB and E. C. Andersen.

490

491 **References Cited**

- 492 1. Jeong H, Tombor B, Albert R, Oltvai ZN, Barabasi AL: **The large-scale organization of metabolic**  
493 **networks**. *Nature* 2000, **407**(6804):651-654.
- 494 2. Winterbach W, Van Mieghem P, Reinders M, Wang HJ, de Ridder D: **Topology of molecular**  
495 **interaction networks**. *Bmc Systems Biology* 2013, **7**.
- 496 3. Minnhagen P, Bernhardsson S: **The Blind Watchmaker Network: Scale-Freeness and Evolution**.  
497 *PLoS One* 2008, **3**(2).
- 498 4. Wagner A, Fell DA: **The small world inside large metabolic networks**. *Proceedings of the Royal*  
499 *Society B-Biological Sciences* 2001, **268**(1478):1803-1810.
- 500 5. Fell DA, Wagner A: **The small world of metabolism**. *Nature Biotechnology* 2000, **18**(11):1121-  
501 1122.
- 502 6. Bernhardsson S, Minnhagen P: **Selective pressure on metabolic network structures as**  
503 **measured from the random blind-watchmaker network**. *New Journal of Physics* 2010, **12**.
- 504 7. Papp B, Teusink B, Notebaart RA: **A critical view of metabolic network adaptations**. *Hfsp*  
505 *Journal* 2009, **3**(1):24-35.
- 506 8. Vitkup D, Kharchenko P, Wagner A: **Influence of metabolic network structure and function on**  
507 **enzyme evolution**. *Genome Biology* 2006, **7**(5).
- 508 9. Greenberg AJ, Stockwell SR, Clark AG: **Evolutionary Constraint and Adaptation in the Metabolic**  
509 **Network of Drosophila**. *Molecular Biology and Evolution* 2008, **25**(12):2537-2546.
- 510 10. Hudson CM, Conant GC: **Expression level, cellular compartment and metabolic network**  
511 **position all influence the average selective constraint on mammalian enzymes**. *Bmc*  
512 *Evolutionary Biology* 2011, **11**.
- 513 11. Kimura M: **Evolutionary rate at the molecular level**. *Nature* 1968, **217**(5129):624-626.

- 514 12. Halligan DL, Keightley PD: **Spontaneous mutation accumulation studies in evolutionary**  
515 **genetics**. *Annual Review of Ecology Evolution and Systematics* 2009, **40**:151-172.
- 516 13. Koschützki D, Schreiber F: **Centrality analysis methods for biological networks and their**  
517 **application to gene regulatory networks**. *Gene Regulation and Systems Biology* 2008,  
518 **2008(2)**:193-201.
- 519 14. Albert R, Jeong H, Barabasi AL: **Error and attack tolerance of complex networks**. *Nature* 2000,  
520 **406(6794)**:378-382.
- 521 15. Wagner GP, Booth G, Bagheri HC: **A population genetic theory of canalization**. *Evolution* 1997,  
522 **51(2)**:329-347.
- 523 16. de Visser J, Hermisson J, Wagner GP, Meyers LA, Bagheri HC, Blanchard JL, Chao L, Cheverud JM,  
524 Elena SF, Fontana W *et al*: **Perspective: Evolution and detection of genetic robustness**.  
525 *Evolution* 2003, **57(9)**:1959-1972.
- 526 17. Proulx SR, Nuzhdin SV, Promislow DEL: **Direct selection on genetic robustness revealed in the**  
527 **yeast transcriptome**. *PLoS One* 2007, **2(9)**:e911.
- 528 18. Stearns SC, Kaiser M, Kawecki TJ: **The differential genetic and environmental canalization of**  
529 **fitness components in *Drosophila melanogaster***. *Journal of Evolutionary Biology* 1995,  
530 **8(5)**:539-557.
- 531 19. Houle D: **How should we explain variation in the genetic variance of traits?** *Genetica* 1998,  
532 **103**:241-253.
- 533 20. Estes S, Ajie BC, Lynch M, Phillips PC: **Spontaneous mutational correlations for life-history,**  
534 **morphological and behavioral characters in *Caenorhabditis elegans***. *Genetics* 2005,  
535 **170(2)**:645-653.
- 536 21. Newman MEJ: **Modularity and community structure in networks**. *Proceedings of the National*  
537 *Academy of Sciences of the United States of America* 2006, **103(23)**:8577-8582.

- 538 22. Wagner GP, Pavlicev M, Cheverud JM: **The road to modularity**. *Nature Reviews Genetics* 2007,  
539 **8**(12):921-931.
- 540 23. Davies SK, Leroi AM, Burt A, Bundy J, Baer CF: **The mutational structure of metabolism in**  
541 ***Caenorhabditis elegans***. *Evolution* 2016.
- 542 24. Ma HW, Zeng AP: **Reconstruction of metabolic networks from genome data and analysis of**  
543 **their global structure for various organisms**. *Bioinformatics* 2003, **19**(2):270-277.
- 544 25. Yilmaz LS, Walhout Albertha JM: **A *Caenorhabditis elegans* genome-scale metabolic network**  
545 **model**. *Cell Systems* 2016, **2**(5):297-311.
- 546 26. Baer CF, Shaw F, Steding C, Baumgartner M, Hawkins A, Houppert A, Mason N, Reed M,  
547 Simonelic K, Woodard W *et al*: **Comparative evolutionary genetics of spontaneous mutations**  
548 **affecting fitness in rhabditid nematodes**. *Proceedings of the National Academy of Sciences of*  
549 *the United States of America* 2005, **102**(16):5785-5790.
- 550 27. Lynch M, Walsh B: **Genetics and Analysis of Quantitative Traits**. Sunderland, MA.: Sinauer;  
551 1998.
- 552 28. Houle D, Morikawa B, Lynch M: **Comparing mutational variabilities**. *Genetics* 1996,  
553 **143**(3):1467-1483.
- 554 29. Koschützki D, Junker BH, Schwender J, Schreiber F: **Structural analysis of metabolic networks**  
555 **based on flux centrality**. *Journal of Theoretical Biology* 2010, **265**(3):261-269.
- 556 30. Clark AG, Wang L, Hulleberg T: **Spontaneous mutation rate of modifiers of metabolism in**  
557 ***Drosophila***. *Genetics* 1995, **139**(2):767-779.
- 558 31. Mezey JG, Houle D: **The dimensionality of genetic variation for wing shape in *Drosophila***  
559 ***melanogaster***. *Evolution* 2005, **59**(5):1027-1038.
- 560 32. Shaw RG: **Comparison of quantitative genetic parameters - reply**. *Evolution* 1992, **46**(6):1967-  
561 1969.



- 562 33. Ma HW, Zeng AP: **The connectivity structure, giant strong component and centrality of**  
563 **metabolic networks.** *Bioinformatics* 2003, **19**(11):1423-1430.
- 564 34. Kim T, Dreher K, Nilo-Poyanco R, Lee I, Fiehn O, Lange BM, Nikolau BJ, Sumner L, Welti R,  
565 Wurtele ES *et al*: **Patterns of Metabolite Changes Identified from Large-Scale Gene**  
566 **Perturbations in Arabidopsis Using a Genome-Scale Metabolic Network.** *Plant Physiology* 2015,  
567 **167**(4):1685-U1890.
- 568 35. Stearns SC, Kawecki TJ: **Fitness sensitivity and the canalization of life-history traits.** *Evolution*  
569 1994, **48**(5):1438-1450.
- 570 36. Ho WC, Zhang JZ: **Adaptive Genetic Robustness of Escherichia coli Metabolic Fluxes.** *Molecular*  
571 *Biology and Evolution* 2016, **33**(5):1164-1176.
- 572 37. Witting M, Lucio M, Tziotis D, Wagele B, Suhre K, Voulhoux R, Garvis S, Schmitt-Kopplin P: **DI-**  
573 **ICR-FT-MS-based high-throughput deep metabotyping: a case study of the Caenorhabditis**  
574 **elegans-Pseudomonas aeruginosa infection model.** *Analytical and Bioanalytical Chemistry*  
575 2015, **407**(4):1059-1073.
- 576 38. Hagberg AA, Schult DA, Swart PJ: **Exploring network structure, dynamics, and function using**  
577 **NetworkX.** In: *7th Python in Science Conference (SciPy2008): 2008; Pasadena, CA USA.*
- 578 39. Keightley PD, Caballero A: **Genomic mutation rates for lifetime reproductive output and**  
579 **lifespan in Caenorhabditis elegans.** *Proceedings of the National Academy of Sciences of the*  
580 *United States of America* 1997, **94**(8):3823-3827.
- 581 40. Denver DR, Wilhelm LJ, Howe DK, Gafner K, Dolan PC, Baer CF: **Variation in base-substitution**  
582 **mutation in experimental and natural lineages of Caenorhabditis nematodes.** *Genome Biology*  
583 *and Evolution* 2012, **4**(4):513-522.
- 584 41. Teotonio H, Estes S, Phillips PC, Baer CF: **Experimental Evolution with Caenorhabditis**  
585 **Nematodes.** *Genetics* 2017, **206**(2):691-716.

- 586 42. Kind T, Wohlgemuth G, Lee do Y, Lu Y, Palazoglu M, S S, Fiehn O: **Mass spectral and retention**  
587 **index libraries for metabolomics based on quadrupole and time-of-flight gas**  
588 **chromatography/mass spectrometry**. *Analytical Chemistry* 2009 **81**:10038-10048.
- 589 43. Halket JM, Przyborowska A, Stein SE, Mallard WG, Down S, Chalmers RA: **Deconvolution gas**  
590 **chromatography/mass spectrometry of urinary organic acids -- potential for pattern**  
591 **recognition and automated identification of metabolic disorders**. *Rapid Communications in*  
592 *Mass Spectrometry* 1999, **13**:279-284.
- 593 44. Behrends V, Tredwell GD, Bundy JG: **Gavin, a add-on to AMDIS, new GUI-driven version**.  
594 *Analytical Biochemistry* 2011, **415** 206–208.
- 595 45. Fry JD: **Estimation of genetic variances and covariances by restricted maximum likelihood**  
596 **using PROC MIXED**. In: *Genetic Analysis of Complex Traits Using SAS*. Edited by Saxton AM. Cary,  
597 NC: SAS Institute, Inc.; 2004: 11-34.
- 598 46. Batagelj V, Zaversnik M: **Fast algorithms for determining (generalized) core groups in social**  
599 **networks**. *Adv Data Anal Classif* 2011, **5**(2):129-145.
- 600
- 601

## Figure Legends

**Figure 1.** (a) Schematic diagram of the mutation accumulation (MA) experiment. An MA experiment is simply a pedigree. The genetically homogeneous ancestral line (G0) was subdivided into 100 MA lines, of which 43 are included in this study. Lines were allowed to accumulate mutations for  $t=250$  generations. At each generation, lines were propagated by a single randomly chosen hermaphrodite ( $N=1$ ). Mutations, represented as colored blocks within a homologous pair of chromosomes, arise initially as heterozygotes and are either lost or fixed over the course of the experiment. At the culmination of the experiment, each line has accumulated its own unique set of mutations. MA lines were compared to the cryopreserved G0 ancestor, which is wild-type at all loci. After [12]. (b) Expected outcome of an MA experiment. As mutations accumulate over time, relative fitness (solid dark blue line) declines from its initial value of 1 at rate  $\Delta M$  per generation and the genetic component of variance (solid orange line) increases from its initial value of 0 at rate  $V_M$  per generation. Trait X (light blue dashed line) is positively correlated with fitness and declines with MA; trait Y (green dashed line) is negatively correlated with fitness and increases with MA. Trajectories are depicted as linear, but they need not be. (c) Accumulation of mutational covariance in an MA experiment. Coordinate axes represent two traits, X and Y. Concentric ellipses show the increase in genetic covariance with MA, beginning from the initial value of zero; the orientation of the ellipses represents the linear relationship between pleiotropic mutational effects on the two traits.

**Figure 2.** Graphical depiction of the metabolic network including all 29 metabolites. Pink nodes represent included metabolites with core number = 1, red nodes represent included metabolites with core number = 2. Gray nodes represent metabolites with which the included 29 metabolites directly interact. Metabolite identification numbers are: 1, L-Serine; 2, Glycine; 3, Nicotinate; 4, Succinate; 5, Uracil; 6, Fumarate; 7, L-Methionine; 8, L-Alanine. 9, L-Aspartate;

10, L-3-Amino-isobutanoate; 11, trans-4-Hydroxy-L-proline; 12, (S) – Malate; 13, 5-Oxoproline; 14, L-Glutamate; 15, L-Phenylalanine; 16, L-Asparagine; 17, D-Ribose; 18, Putrescine; 19, Citrate; 20, Adenine; 21, L-Lysine; 22, L-Tyrosine; 23, Pantothenate; 24, Xanthine; 25, Hexadecanoic acid; 26, Urate; 27, L-Tryptophan; 28, Adenosine; 29, Alpha;alpha-Trehalose.

**Figure 3.** Schematic depiction of the  $k$ -cores of a graph. The  $k$ -core of a graph is the largest subgraph that contains nodes of degree at least  $k$ . The colored balls represent nodes in a network and the black lines represent connecting edges. Each red ball in the darkest gray area has core number  $k=3$ ; note that each node with  $k=3$  is connected to at least three other nodes. After Batagelj and Zaveršnik [46].

Figure 1

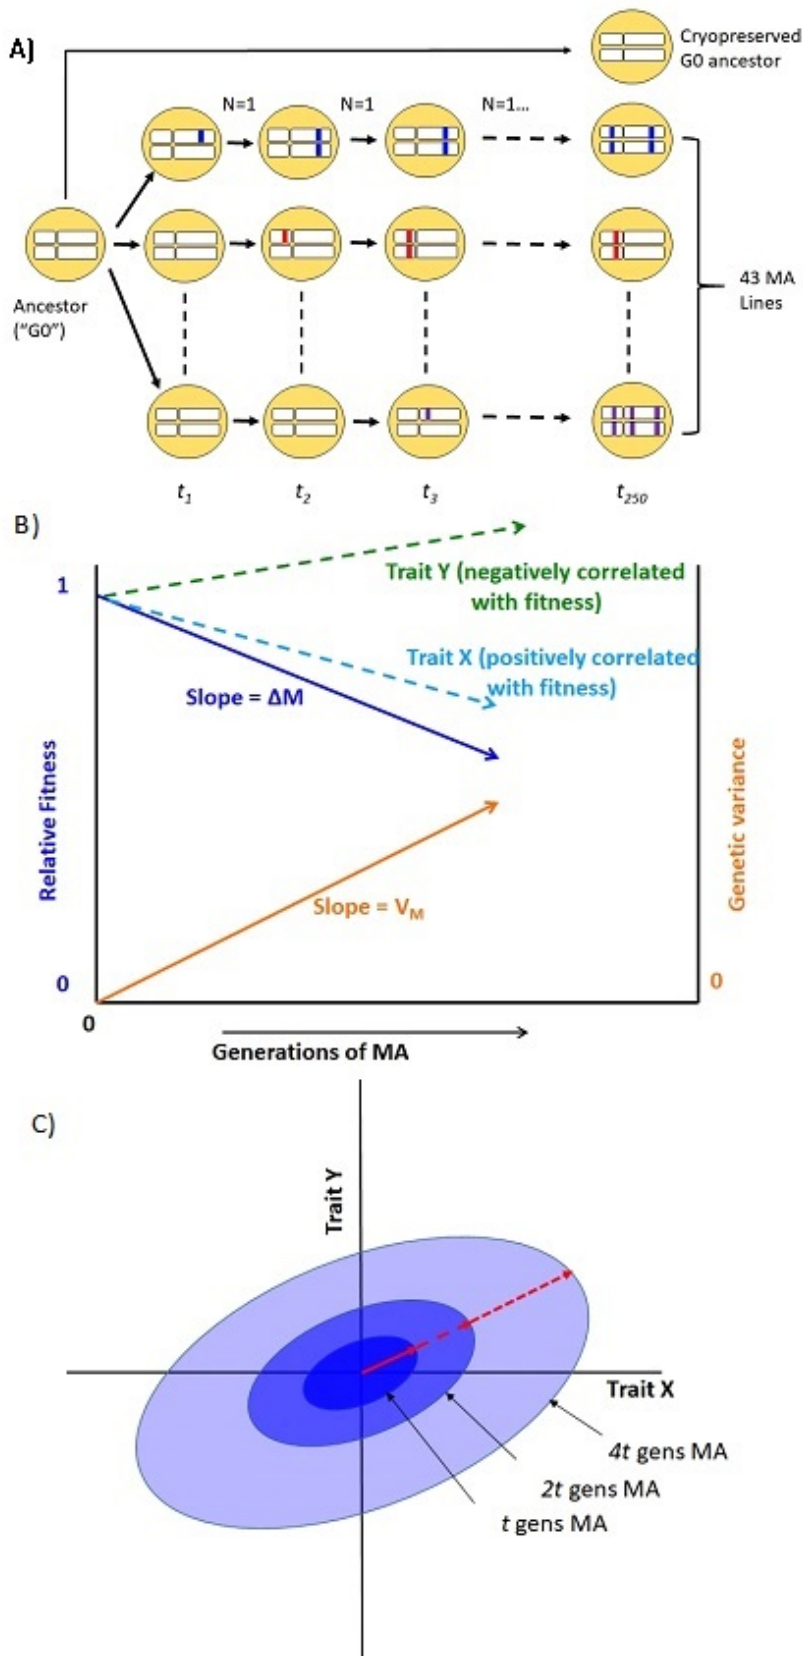

Figure 2

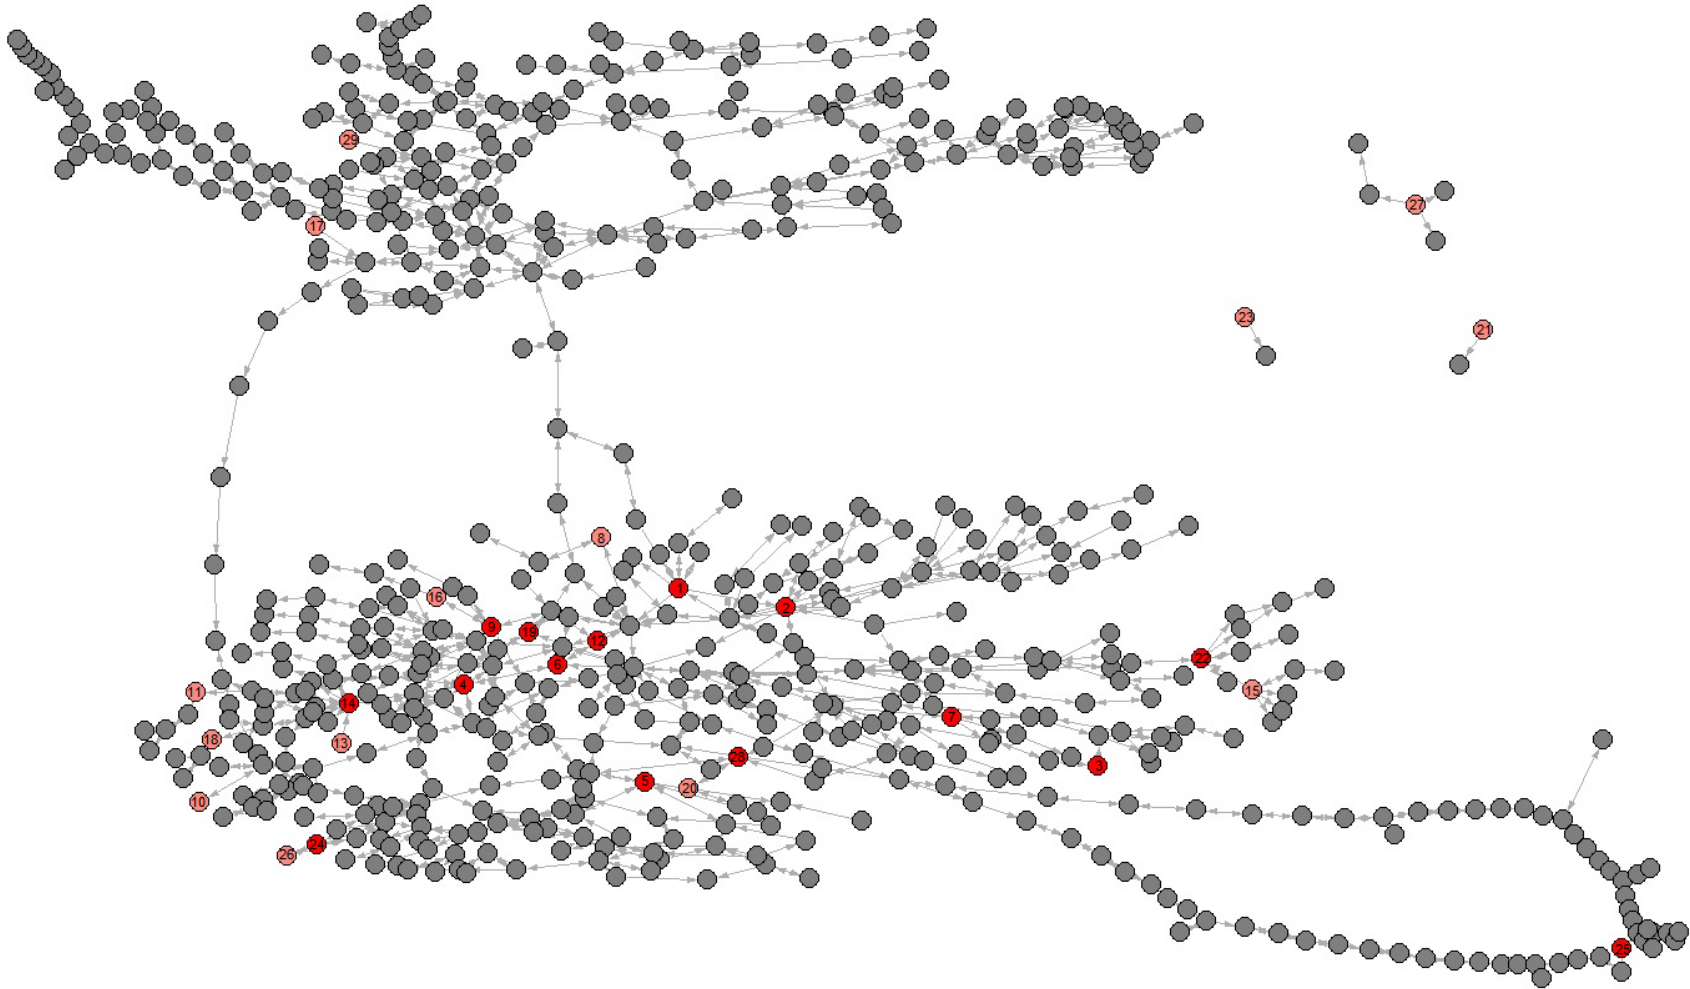

Figure 3

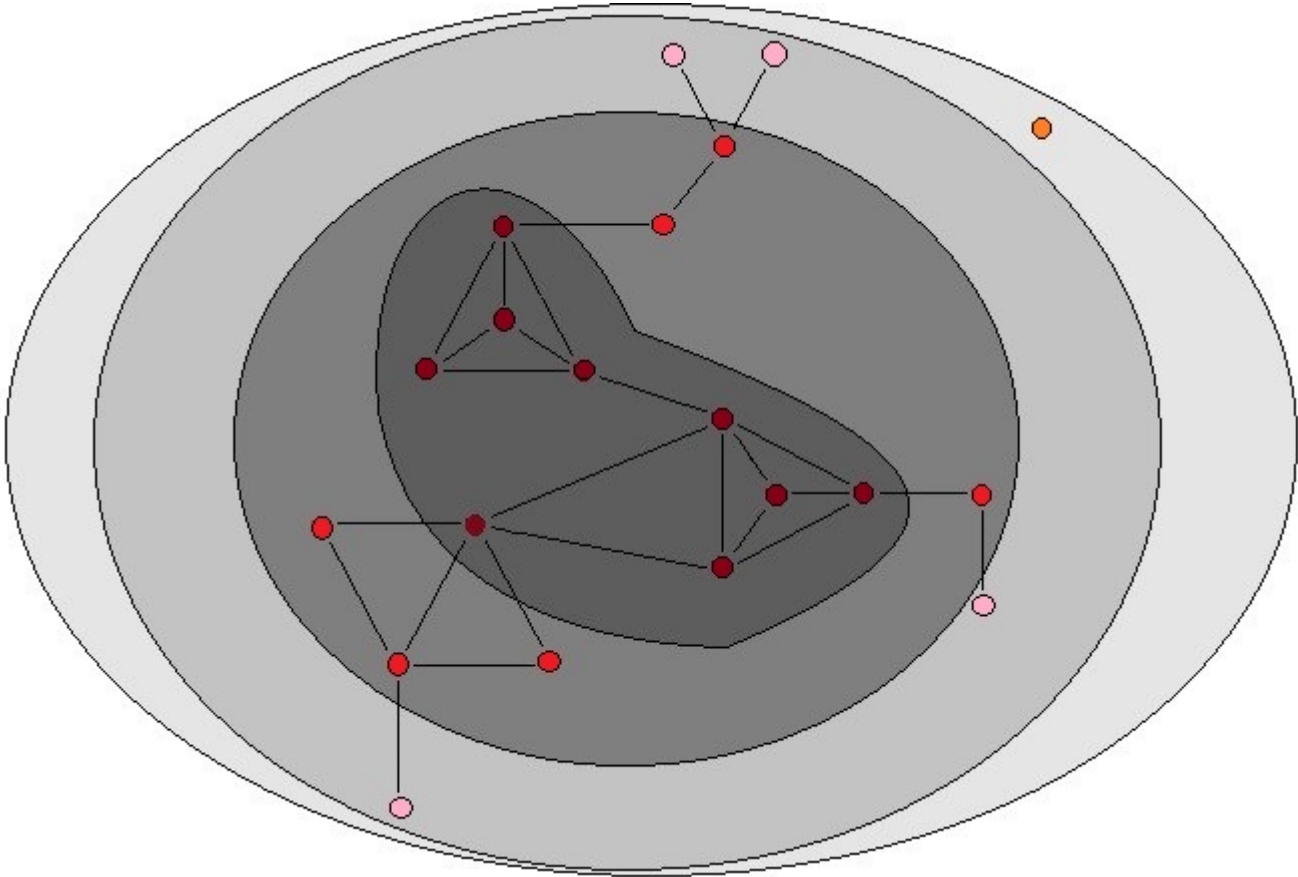

| Parameter                                          | Heuristic Definition                                                                                                                                                                                             | Formal Definition                                                                                                                                                                                                                                                                                                                                                                                                                                             |
|----------------------------------------------------|------------------------------------------------------------------------------------------------------------------------------------------------------------------------------------------------------------------|---------------------------------------------------------------------------------------------------------------------------------------------------------------------------------------------------------------------------------------------------------------------------------------------------------------------------------------------------------------------------------------------------------------------------------------------------------------|
| In Degree ( <b>IN</b> <sup>o</sup> ), $deg^+(v)$   | The number of incoming edges to node $v$ in a directed graph.                                                                                                                                                    | self-explanatory                                                                                                                                                                                                                                                                                                                                                                                                                                              |
| Out Degree ( <b>OUT</b> <sup>o</sup> ), $deg^-(v)$ | The number of outgoing edges from node $v$ in a directed graph.                                                                                                                                                  | self-explanatory                                                                                                                                                                                                                                                                                                                                                                                                                                              |
| Shortest Path Length, $d(v, u)$                    | Shortest distance from node $v$ to another node $u$ with no repeated walks                                                                                                                                       | self-explanatory                                                                                                                                                                                                                                                                                                                                                                                                                                              |
| Betweenness Centrality ( <b>BET</b> ), $c_B(v)$    | Betweenness centrality of node $v$ is the sum of the fraction of all-pairs shortest paths that pass through $v$ . The greater $c_B(v)$ , the greater the fraction of shortest paths that pass through node $v$ . | $\frac{c_B(v)}{(n-1)(n-2)}$ , where $c_B(v) = \sum_{s,t \in V} \frac{\sigma(s,t v)}{\sigma(s,t)}$ , $V$ is the set of nodes, $\sigma(s, t)$ is the number of shortest paths from node $s$ to node $t$ , $\sigma(s, t v)$ is the number of paths from $s$ to $t$ that pass through node $v$ , and $n$ is the number of nodes in the graph. The denominator $(n-1)(n-2)$ is the normalization factor for a directed graph that scales $c_B(v)$ between 0 and 1. |
| Closeness Centrality ( <b>CLO</b> ),               | Closeness centrality of node $v$ is the reciprocal of                                                                                                                                                            | $C(v) = \frac{n-1}{\sum_{u=1}^{n-1} d(u,v)}$ , where $n$ is the number of                                                                                                                                                                                                                                                                                                                                                                                     |



| Parameter                                        | Heuristic Definition                                                                                                                                                                                     | Formal Definition                                                                                                                                                                       |
|--------------------------------------------------|----------------------------------------------------------------------------------------------------------------------------------------------------------------------------------------------------------|-----------------------------------------------------------------------------------------------------------------------------------------------------------------------------------------|
| $C(v)$                                           | the sum of the shortest path lengths to all $n-1$ other nodes, normalized by the sum of minimum possible distances $n-1$ . The greater $C(v)$ , the closer $v$ is to other nodes.                        | nodes and $d(u, v)$ is the shortest path distance between $u$ and $v$ .                                                                                                                 |
| Degree Centrality ( <b>DEG</b> ), $C_D(v)$       | Degree centrality of node $v$ is the fraction of nodes in the network that node $v$ is connected to.                                                                                                     | $C_D(v) = \frac{deg^+(v)+deg^-(v)}{n-1}$ , where $n$ is the number of nodes in the network.                                                                                             |
| Core Number ( <b>CORE</b> )                      | A $k$ -core is the largest subgraph that contains nodes of at least degree $k$ . The core number of node $v$ is the largest value $k$ of a $k$ -core containing node $v$ .                               | Calculated using the algorithm of Batagelj and Zaversnik (2011).                                                                                                                        |
| Mutational Bias ( <b><math>\Delta M</math></b> ) | Per-generation rate of change of the trait mean in an MA experiment. Equivalent to the product of the genome-wide mutation rate, $\mu_G$ , and the average effect of a mutation on the trait, $\alpha$ . | $\Delta M_z = \frac{\bar{z}_{MA} - \bar{z}_0}{t\bar{z}_0}$ ; $\bar{z}_{MA}$ and $\bar{z}_0$ represent the MA and ancestral (G0) trait means and $t$ is the number of generations of MA. |
| Mutational Variance ( $V_M$ )                    | Per-generation rate of increase in genetic variance for a trait in an MA experiment.                                                                                                                     | $V_M = \Delta V_L = \frac{V_{L,MA} - V_{L,G0}}{2t}$ , where $V_{L,MA}$ is the variance among MA lines, $V_{L,G0}$ is the among-                                                         |

| Parameter                                          | Heuristic Definition                                                                                                                                                                                       | Formal Definition                                                                                                                 |
|----------------------------------------------------|------------------------------------------------------------------------------------------------------------------------------------------------------------------------------------------------------------|-----------------------------------------------------------------------------------------------------------------------------------|
|                                                    | Equivalent to the product of the genome-wide mutation rate, $\mu_G$ , and the square of the average effect of a mutation on the trait, $\alpha^2$ .                                                        | line variance in the G0 ancestor, and $t$ is the number of generations of MA                                                      |
| Squared coefficient of variation<br>( $I_M, I_E$ ) | $I_M$ is the mutational variance ( $V_M$ ) scaled by the square of the trait mean, and provides a measure of the evolvability of a trait. $I_E$ is the residual variance ( $V_E$ ) scaled in the same way. |                                                                                                                                   |
| Mutational heritability ( $h_M^2$ )                | Mutational variance ( $V_M$ ) scaled as a fraction of the residual variance ( $V_E$ ). Provides a measure of the short-term response to selection on mutational variance.                                  | $h_M^2 = \frac{V_M}{V_E}$                                                                                                         |
| Mutational correlation ( $r_M$ )                   | Genetic correlation between two traits in MA lines. Provides an estimate of pleiotropic effects of new mutations.                                                                                          | $r_M = \frac{COV_M(X,Y)}{\sqrt{V_M(X)V_M(Y)}}$ , where $COV_M$ is the mutational covariance and $V_M$ is the mutational variance. |

**Table 1.** Definitions of network parameters, following the documentation of NetworkX, v.1.11 (Hagberg et al. 2008) and quantitative genetic parameters. Abbreviations of the parameters used in Table 2 follow the parameter name in parentheses in bold type.



|      | BTW | CLO  | DEG  | IN°  | OUT° | CORE | $\Delta M$    | $ \Delta M $  | $I_M$         | $I_E$         | $h_M^2$       |
|------|-----|------|------|------|------|------|---------------|---------------|---------------|---------------|---------------|
| BTW  |     | 0.60 | 0.84 | 0.86 | 0.66 | 0.79 | -0.009 (0.96) | -0.055 (0.77) | -0.007 (0.97) | -0.122 (0.52) | 0.128 (0.51)  |
| CLO  |     |      | 0.54 | 0.51 | 0.47 | 0.54 | 0.012 (0.94)  | 0.297 (0.11)  | 0.119 (0.53)  | 0.034 (0.86)  | 0.089 (0.64)  |
| DEG  |     |      |      | 0.88 | 0.92 | 0.83 | 0.038 (0.84)  | -0.078 (0.68) | 0.178 (0.35)  | -0.062 (0.74) | 0.218 (0.25)  |
| IN°  |     |      |      |      | 0.65 | 0.85 | 0.099 (0.60)  | 0.043 (0.82)  | 0.188 (0.32)  | 0.007 (0.97)  | 0.277 (0.14)  |
| OUT° |     |      |      |      |      | 0.68 | 0.031 (0.87)  | -0.200 (0.29) | 0.133 (0.49)  | -0.096 (0.62) | 0.139 (0.47)  |
| CORE |     |      |      |      |      |      | 0.245 (0.20)  | 0.104 (0.59)  | 0.298 (0.11)  | 0.025 (0.89)  | 0.481 (0.008) |

**Table 2.** Spearman's rank correlation  $\rho$  between network parameters (rows/first five columns) and between network parameters and mutational parameters (rows/last four columns). Abbreviations of network parameters are: BTW, betweenness centrality; CLO, closeness centrality; DEG, degree centrality; IN°, in-degree, OUT°, out-degree; CORE, core number. Network parameters are defined mathematically and heuristically in Table 1. Abbreviations of mutational parameters are:  $\Delta M$ , per-generation change in the trait mean;  $|\Delta M|$ , absolute value of  $\Delta M$ ;  $I_M$ , squared mutational coefficient of variation;  $I_E$ , squared residual coefficient of variation;  $h_M^2$ , mutational heritability. See text and Supplementary Table S1 for details of mutational parameters. Uncorrected P-values of mutational parameters are given in parentheses.

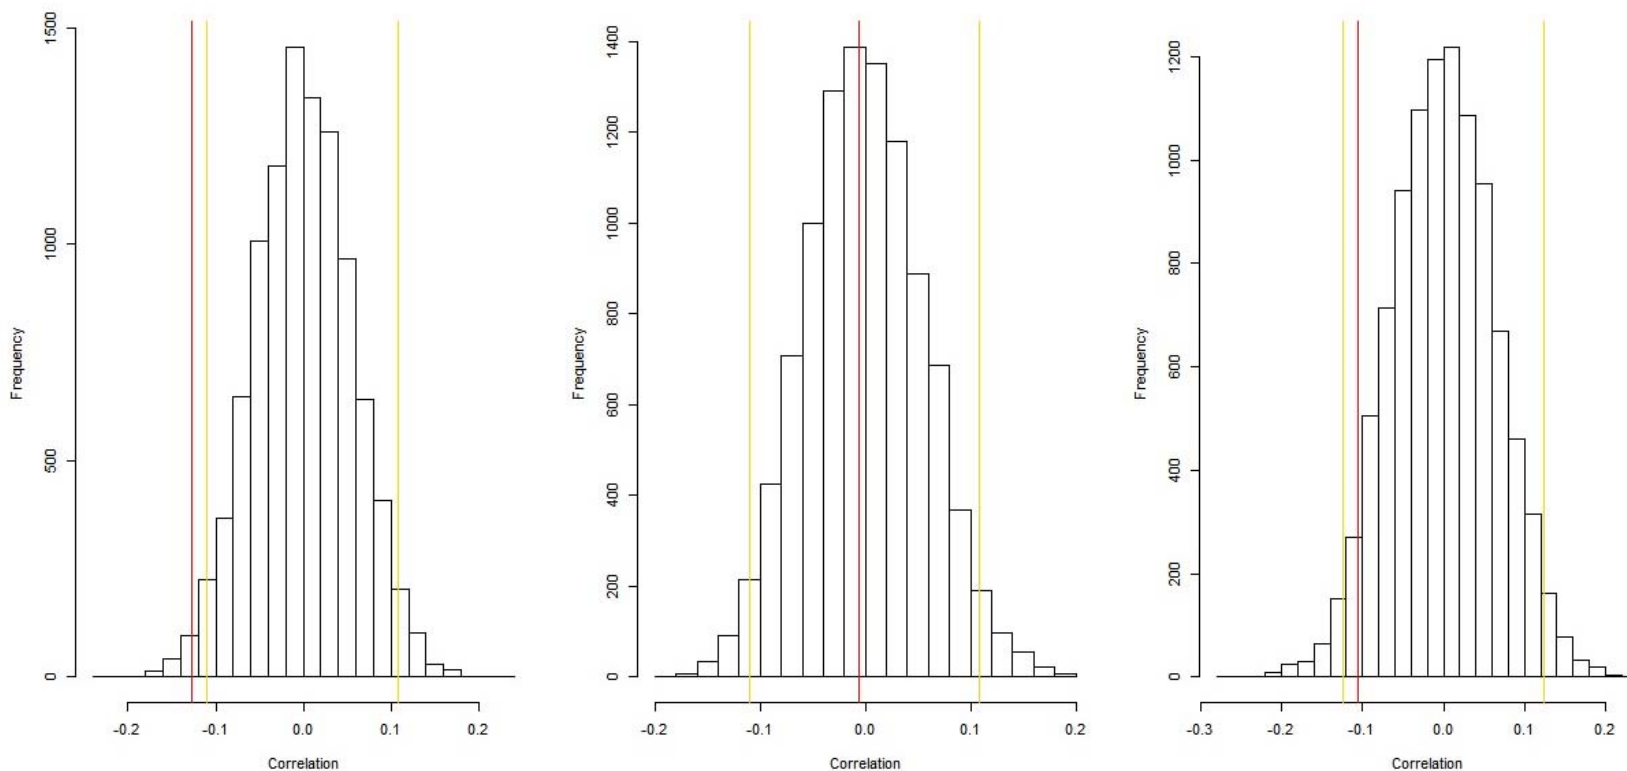

**Supplementary Figure S1** - Parametric bootstrap distributions of random correlations  $\rho$  between (a)  $r_M$  and the shortest path length in the directed network, (b)  $|r_M|$  and the shortest path length in the directed network, (c)  $r_M$  and shortest path length in the undirected network (i.e., the shorter of the two path lengths between metabolites  $i$  and  $j$  in the directed network). Red lines show the observed values of  $\rho$ , yellow lines show the 95% confidence interval of the distribution of the correlation between the mutational correlation and a random shortest path length drawn from the observed distribution of shortest path lengths. See Methods for details.

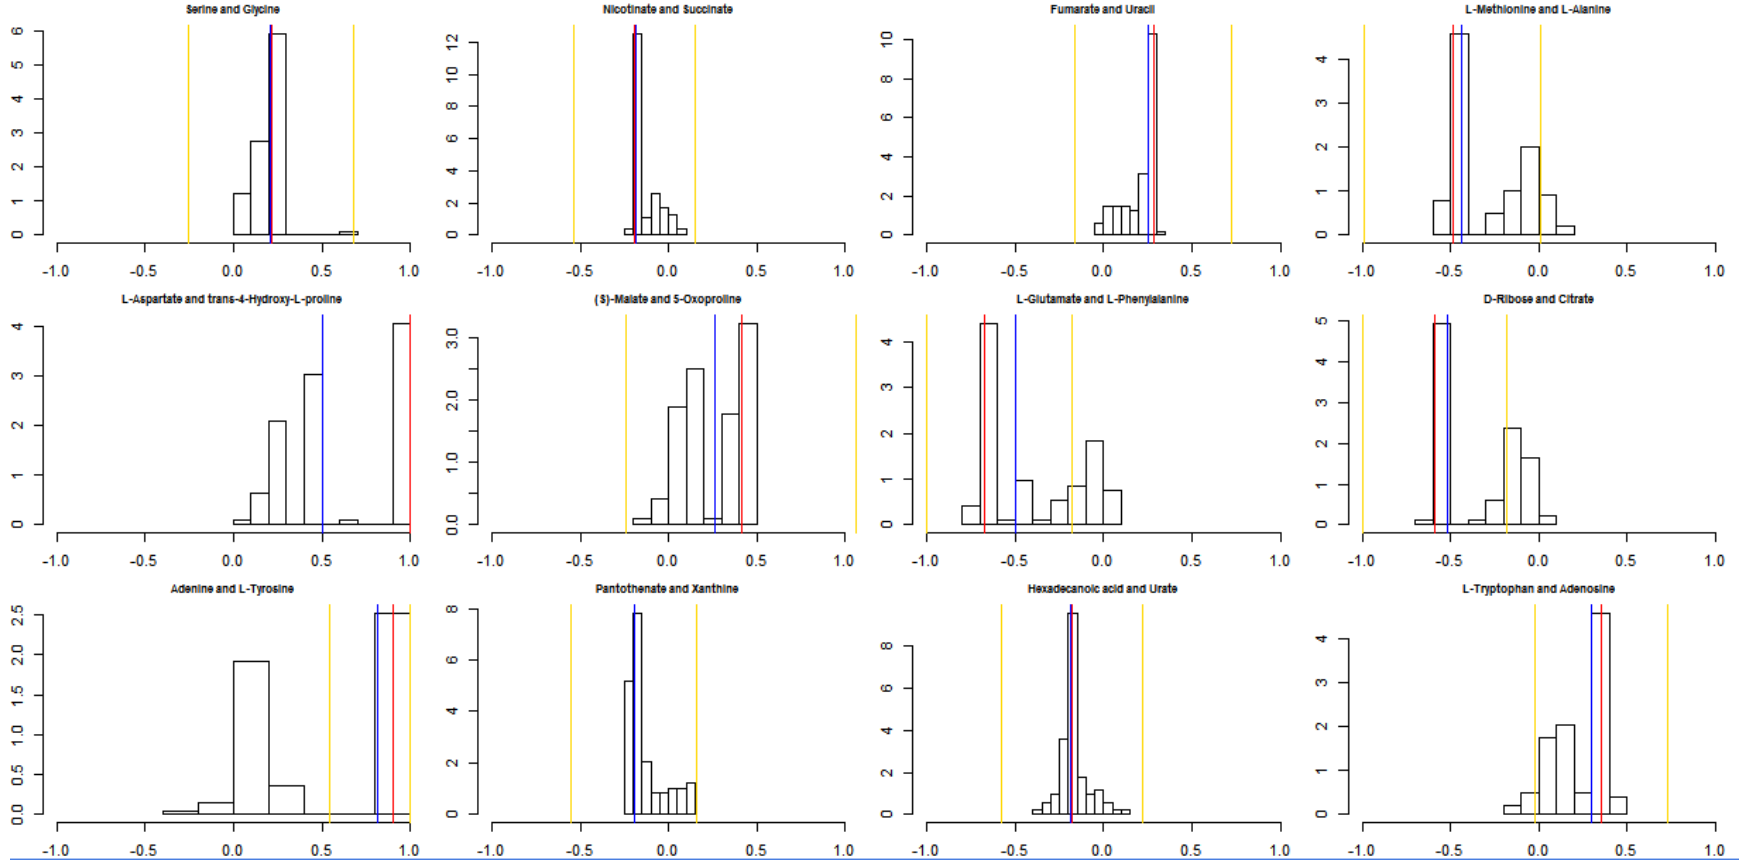

**Supplementary Figure S2.** Bootstrap distributions of mutational correlations ( $r_M$ ) calculated from the joint REML estimate of the among-line components of covariance from a pair of focal metabolites (listed at the top of each panel) and six other metabolites randomly sampled without replacement. Each distribution is based on 100 resamples from the data. Red lines show the observed

$r_M$ , blue lines show the median of the resampled values, yellow lines show  $\pm$  two standard errors of the observed  $r_M$ . Details of the bootstrap analysis are given in the Methods.

| <b>Metabolite</b>         | <b>ID #</b> | <b>BTW</b> | <b>CLO</b> | <b>DEG</b> | <b>IN°</b> | <b>OUT°</b> | <b>CORE</b> |
|---------------------------|-------------|------------|------------|------------|------------|-------------|-------------|
| trans-4-Hydroxy-L-proline | 11          | 0.004482   | 0.002761   | 0.004658   | 2          | 1           | 1           |
| L-3-Amino-isobutanoate    | 10          | 0          | 0          | 0.001553   | 1          | 0           | 1           |
| Adenine                   | 20          | 0.003335   | 0.032205   | 0.009317   | 2          | 4           | 2           |
| Adenosine                 | 28          | 0.005516   | 0.032198   | 0.009317   | 4          | 2           | 2           |
| L-Alanine                 | 8           | 0          | 0          | 0.001553   | 1          | 0           | 1           |
| L-Asparagine              | 16          | 0.002236   | 0.052579   | 0.004658   | 1          | 2           | 1           |
| L-Aspartate               | 9           | 0.055054   | 0.056756   | 0.012422   | 3          | 5           | 2           |
| Citrate                   | 19          | 0.171567   | 0.058576   | 0.012422   | 4          | 4           | 2           |
| Fumarate                  | 6           | 0.028317   | 0.053784   | 0.007764   | 3          | 2           | 2           |
| L-Glutamate               | 14          | 0.036659   | 0.048283   | 0.020186   | 5          | 8           | 2           |
| Glycine                   | 2           | 0.02661    | 0.044377   | 0.017081   | 5          | 6           | 2           |
| L-Lysine                  | 21          | 0          | 0.004658   | 0.004658   | 0          | 3           | 1           |
| (S) – Malate              | 12          | 0.029016   | 0.057446   | 0.007764   | 2          | 3           | 2           |
| L-Methionine              | 7           | 7.49E-05   | 0.004969   | 0.007764   | 2          | 3           | 2           |
| Nicotinate                | 3           | 0.00221    | 0.046122   | 0.006211   | 2          | 2           | 2           |
| Hexadecanoic acid         | 25          | 0.066162   | 0.019529   | 0.01087    | 2          | 5           | 2           |



| <b>Metabolite</b>     | <b>ID #</b> | <b>BTW</b> | <b>CLO</b> | <b>DEG</b> | <b>In°</b> | <b>Out°</b> | <b>Core</b> |
|-----------------------|-------------|------------|------------|------------|------------|-------------|-------------|
| Pantothenate          | 23          | 0          | 0.001553   | 0.001553   | 0          | 1           | 1           |
| L-Phenylalanine       | 15          | 0.001137   | 0.040279   | 0.009317   | 1          | 5           | 1           |
| Putrescine            | 18          | 0.003362   | 0.002795   | 0.003106   | 1          | 1           | 1           |
| 5-Oxoproline          | 13          | 0          | 0.045387   | 0.001553   | 0          | 1           | 1           |
| D-Ribose              | 17          | 0          | 0.044346   | 0.001553   | 0          | 1           | 1           |
| L-Serine              | 1           | 0.034582   | 0.057313   | 0.017081   | 5          | 6           | 2           |
| Succinate             | 4           | 0.02215    | 0.051067   | 0.01087    | 4          | 3           | 2           |
| Alpha,alpha-Trehalose | 29          | 0          | 0.042179   | 0.001553   | 0          | 1           | 1           |
| L-Tryptophan          | 27          | 0          | 0.004969   | 0.004658   | 0          | 3           | 1           |
| L-Tyrosine            | 22          | 0.004518   | 0.041547   | 0.012422   | 3          | 5           | 2           |
| Uracil                | 5           | 0.078303   | 0.044365   | 0.01087    | 4          | 3           | 2           |
| Urate                 | 26          | 0          | 0.029702   | 0.003106   | 1          | 1           | 1           |
| Xanthine              | 24          | 0.004393   | 0.031003   | 0.01087    | 3          | 4           | 2           |

**Supplementary Table S1(a), above.** Network parameters for the 29 metabolites. Column headings are the abbreviations for the network parameters given in Tables 1 and 2. ID# is the number of the metabolite in the network shown in Figure 1.

| <b>Metabolite</b>         | <b>ID #</b> | <b>Mean (G0)</b> | <b>Mean (MA)</b> | <b><math>\Delta M</math> (%)</b> | <b>VL</b>         | <b>VM</b>          | <b>VE</b>          | <b><math>I_M</math></b> | <b><math>h_M^2 (x 10^3)</math></b> |
|---------------------------|-------------|------------------|------------------|----------------------------------|-------------------|--------------------|--------------------|-------------------------|------------------------------------|
| trans-4-Hydroxy-L-proline | 11          | 228.6<br>(10.4)  | 149.4<br>(14.5)  | 0.14<br>(0.02)                   | 1058.0<br>(349.0) | 2.12<br>(0.70)     | 3577.4<br>(1052.3) | 9.45E-05                | 0.59<br>(0.26)                     |
| L-3-Amino-isobutanoate    | 10          | 20.0<br>(3.1)    | 14.5<br>(0.8)    | -0.11<br>(0.06)                  | 3.58<br>(4.32)    | 0.007<br>(0.009)   | 95.0<br>(9.86)     | 3.43E-05                | 0.08<br>(0.09)                     |
| Adenine                   | 20          | 11.3<br>(1.4)    | 13.2<br>(0.8)    | 0.07<br>(0.06)                   | 15.4<br>(4.4)     | 0.03<br>(0.009)    | 28.0<br>(4.02)     | 0.000178                | 1.10<br>(0.35)                     |
| Adenosine                 | 28          | 2.1<br>(0.7)     | 26.0<br>(3.4)    | 4.39<br>(0.62)                   | 407.7<br>(78.2)   | 0.82<br>(0.16)     | 186.5<br>(75.9)    | 0.001261                | 4.37<br>(1.97)                     |
| L-Alanine                 | 8           | 5.5<br>(1.5)     | 6.1<br>(0.6)     | 0.04<br>(0.12)                   | 5.48<br>(3.43)    | 0.011<br>(0.007)   | 30.3<br>(5.0)      | 0.000278                | 0.36<br>(0.23)                     |
| L-Asparagine              | 16          | 3.7<br>(1.3)     | 1.2<br>(0.1)     | -0.27<br>(0.14)                  | 0.11<br>(0.15)    | 0.0002<br>(0.0003) | 2.4<br>(0.4)       | 0.000135                | 0.09<br>(0.13)                     |
| L-Aspartate               | 9           | 37.7<br>(2.7)    | 19.0<br>(1.2)    | -0.20<br>(0.03)                  | 48.2<br>(19.2)    | 0.096<br>(0.038)   | 60.2<br>(18.2)     | 0.00026                 | 1.60<br>(0.80)                     |
| Citrate                   | 19          | 11.4<br>(2.2)    | 5.7.1<br>(0.5)   | -0.16<br>(0.08)                  | 4.56<br>(1.54)    | 0.009<br>(0.003)   | 19.8<br>(6.8)      | 0.000182                | 0.46<br>(0.22)                     |

| <b>Metabolite</b> | <b>ID #</b> | <b>Mean (G0)</b> | <b>Mean (MA)</b> | <b><math>\Delta M</math> (%)</b> | <b>VL</b>          | <b>VM</b>        | <b>VE</b>          | <b><math>I_M</math></b> | <b><math>h_M^2 (x 10^3)</math></b> |
|-------------------|-------------|------------------|------------------|----------------------------------|--------------------|------------------|--------------------|-------------------------|------------------------------------|
| Fumarate          | 6           | 33.0<br>(2.1)    | 25.5<br>(1.2)    | -0.09<br>(0.03)                  | 35.1<br>(9.2)      | 0.070<br>(0.018) | 84.1<br>(26.1)     | 0.000109                | 0.83<br>(0.34)                     |
| L-Glutamate       | 14          | 115.2<br>(24.5)  | 93.2<br>(6.3)    | -0.08<br>(0.09)                  | 973.0<br>(556.8)   | 1.94<br>(1.11)   | 2703.7<br>(556.9)  | 0.000214                | 0.72<br>(0.44)                     |
| Glycine           | 2           | 47.1<br>(5.3)    | 52.8<br>(4.5)    | 0.05<br>(0.06)                   | 606.7<br>(411.6)   | 1.21<br>(0.82)   | 939.3<br>(323.7)   | 0.000393                | 1.29<br>(0.98)                     |
| L-Lysine          | 21          | 6.7<br>(2.6)     | 5.0<br>(0.6)     | -0.10<br>(0.16)                  | 4.43<br>(3.99)     | 0.009<br>(0.008) | 38.4<br>(7.01)     | 0.00032                 | 0.23<br>(0.21)                     |
| (S) – Malate      | 12          | 44.7<br>(4.0)    | 71.9<br>(4.2)    | 0.24<br>(0.05)                   | 397.8<br>(135.4)   | 0.80<br>(0.27)   | 1179.7<br>(276.2)  | 0.000157                | 0.67<br>(0.28)                     |
| L-Methionine      | 7           | 47.9<br>(4.1)    | 32.2<br>(1.7)    | -0.13<br>(0.04)                  | 101.2<br>(20.5)    | 0.202<br>(0.041) | 72.4<br>(13.4)     | 0.000197                | 2.79<br>(0.77)                     |
| Nicotinate        | 3           | 4.9<br>(0.6)     | 33.0<br>(3.5)    | 2.29<br>(0.29)                   | 473.9<br>(88.1)    | 0.95<br>(0.18)   | 120.3<br>(21.4)    | 0.000863                | 7.88<br>(2.03)                     |
| Hexadecanoic acid | 25          | 238.4<br>(22.3)  | 265.1<br>(15.0)  | -0.03<br>(0.04)                  | 6712.9<br>(1579.6) | 13.43<br>(3.16)  | 9579.1<br>(2985.7) | 0.000194                | 1.40<br>(0.55)                     |

| <b>Metabolite</b>     | <b>ID #</b> | <b>Mean (G0)</b>  | <b>Mean (MA)</b>  | <b><math>\Delta M</math> (%)</b> | <b>VL</b>           | <b>VM</b>          | <b>VE</b>            | <b><math>I_M</math></b> | <b><math>h_M^2</math> (<math>\times 10^3</math>)</b> |
|-----------------------|-------------|-------------------|-------------------|----------------------------------|---------------------|--------------------|----------------------|-------------------------|------------------------------------------------------|
| Pantothenate          | 23          | 22.9<br>(0.8)     | 14.4<br>(0.6)     | -0.15<br>(0.02)                  | 12.8<br>3.2         | 0.026<br>(0.006)   | 16.0<br>(3.17)       | 0.000123                | 1.60<br>(0.51)                                       |
| L-Phenylalanine       | 15          | 87.4<br>(7.9)     | 94.4<br>(6.3)     | 0.03<br>(0.05)                   | 678.9<br>(263.6)    | 1.36<br>(0.53)     | 3835.0<br>(810.3)    | 0.000155                | 0.35<br>(0.16)                                       |
| Putrescine            | 18          | 73.7<br>(15.3)    | 57.4<br>(3.4)     | -0.09<br>(0.08)                  | 70.9<br>(70.6)      | 0.14<br>(0.14)     | 1672.3<br>(193.2)    | 4.15E-05                | 0.08<br>(0.08)                                       |
| 5-Oxoproline          | 13          | 701.6<br>(40.0)   | 528.2<br>(22.2)   | -0.10<br>(0.03)                  | 7275.6<br>(3649.0)  | 14.56<br>(7.30)    | 52146.6<br>(13671.9) | 5.24E-05                | 0.28<br>(0.16)                                       |
| D-Ribose              | 17          | 5.6<br>(0.8)      | 13.3<br>(1.5)     | 0.51<br>(0.11)                   | 76.3<br>(22.8)      | 0.15<br>(0.05)     | 66.3<br>(27.2)       | 0.000841                | 2.30<br>(1.17)                                       |
| L-Serine              | 1           | 130.0<br>(49.8)   | 85.8<br>(3.7)     | -0.14<br>(0.15)                  | 373.7<br>(117.7)    | 0.75<br>(0.24)     | 1221.7<br>(376.9)    | 9.87E-05                | 0.61<br>(0.27)                                       |
| Succinate             | 4           | 7.3<br>(0.8)      | 91.1<br>(9.7)     | 4.52<br>(0.51)                   | 3216.6<br>(688.3)   | 6.43<br>(1.38)     | 2797.7<br>(932.6)    | 0.000778                | 2.30<br>(0.91)                                       |
| Alpha,alpha-Trehalose | 29          | 1772.2<br>(147.2) | 2525.4<br>(277.6) | 0.19<br>(0.07)                   | 2118803<br>(105069) | 4237.6<br>(2101.4) | 4355039<br>(1656108) | 0.000584                | 0.97<br>(0.61)                                       |

| <b>Metabolite</b> | <b>ID #</b> | <b>Mean (G0)</b> | <b>Mean (MA)</b> | <b><math>\Delta M</math> (%)</b> | <b>VL</b>       | <b>VM</b>        | <b>VE</b>       | <b><math>I_M</math></b> | <b><math>h_M^2 (x 10^3)</math></b> |
|-------------------|-------------|------------------|------------------|----------------------------------|-----------------|------------------|-----------------|-------------------------|------------------------------------|
| L-Tryptophan      | 27          | 107.7<br>(14.3)  | 92.2<br>(2.8)    | -0.06<br>(0.05)                  | 205.7<br>(87.3) | 0.411<br>(0.174) | 496.9<br>(64.0) | 4.93E-05                | 0.83<br>(0.37)                     |
| L-Tyrosine        | 22          | 74.7<br>(9.3)    | 47.9<br>(2.9)    | -0.14<br>(0.05)                  | 197.2<br>(70.9) | 0.394<br>(0.142) | 643.3<br>(99.7) | 0.00017                 | 0.61<br>(0.24)                     |
| Uracil            | 5           | 9.5<br>(1.0)     | 8.8<br>(0.4)     | -0.03<br>(0.05)                  | 4.67<br>(1.59)  | 0.009<br>(0.003) | 8.3<br>(1.4)    | 0.000123                | 1.13<br>(0.43)                     |
| Urate             | 26          | 20.7<br>(3.4)    | 11.5<br>(1.2)    | -0.18<br>(0.07)                  | 45.3<br>(20.1)  | 0.091<br>(0.040) | 45.3<br>(4.75)  | 0.000654                | 2.00<br>(0.91)                     |
| Xanthine          | 24          | 0.4<br>(0.3)     | 6.7<br>(1.0)     | 6.64<br>(1.09)                   | 36.5<br>(8.04)  | 0.073<br>(0.016) | 15.5<br>(2.8)   | 0.001711                | 4.70<br>(1.34)                     |
| <b>Mean</b>       |             |                  | 0.73*<br>(0.30)  |                                  |                 |                  | 1.46<br>(0.31)  |                         |                                    |
| <b>Median</b>     |             |                  | 0.14             |                                  |                 |                  | 0.83            |                         |                                    |

**Supplementary Table S1(b).** Mutational statistics of the 29 metabolites, reprised from Supplementary Table S1 of Davies et al. (2016). Column Headings are: *ID#*, the number of the metabolite in the network shown in Figure 1; *Mean (G0)*, mean metabolite pool of the G0 ancestor; *Mean (MA)*, mean metabolite pool of the MA lines;  *$\Delta M$  (%)*, percent change per-generation in mean trait

value;  $VL$ , among-line component of variance,  $VM$ , mutational variance;  $CV_{M,G0}$ , mutational coefficient of variation standardized by the G0 mean;  $CV_{M,MA}$ , mutational coefficient of variation standardized by the MA mean;  $VE$ , environmental (= within-line) component of variance;  $h_M^2$ , mutational heritability.

\* - Mean  $\Delta M$  (%) is the mean absolute value.

| Reaction Number | Reaction                                                                                                                                  |
|-----------------|-------------------------------------------------------------------------------------------------------------------------------------------|
| R01579          | D-Glutamine + H <sub>2</sub> O = D-Glutamate + NH <sub>3</sub>                                                                            |
| R01887          | gamma-Amino-gamma-cyanobutanoate + 2 H <sub>2</sub> O = DL-Glutamate + NH <sub>3</sub>                                                    |
| R04936          | Se-Adenosylselenohomocysteine + H <sub>2</sub> O = Adenosine +Selenohomocysteine                                                          |
| R00891          | L-Serine + Hydrogen sulfide = L-Cysteine + H <sub>2</sub> O                                                                               |
| R09099          | L-Serine + 5,6,7,8-Tetrahydromethanopterin = 5,10-Methylenetetrahydromethanopterin + Glycine + H <sub>2</sub> O                           |
| R02853          | D-O-Phosphoserine + H <sub>2</sub> O = D-Serine + Orthophosphate                                                                          |
| R00904          | 3-Aminopropanal + NAD <sup>+</sup> + H <sub>2</sub> O = beta-Alanine + NADH + H <sup>+</sup>                                              |
| R03542          | alpha-Aminopropionitrile + 2 H <sub>2</sub> O = Alanine + NH <sub>3</sub>                                                                 |
| R01324          | Citrate = Isocitrate                                                                                                                      |
| R00483          | ATP + L-Aspartate + NH <sub>3</sub> = AMP + Diphosphate + L-Asparagine                                                                    |
| R01221          | Glycine + Tetrahydrofolate + NAD <sup>+</sup> = 5,10-Methylenetetrahydrofolate+ NH <sub>3</sub> + CO <sub>2</sub> + NADH + H <sup>+</sup> |
| R02078          | 3,4-Dihydroxy-L-phenylalanine + L-Tyrosine + Oxygen = Dopaquinone+ 3,4-Dihydroxy-L-phenylalanine + H <sub>2</sub> O                       |
| R01706          | Hexadecanoyl-[acp] + H <sub>2</sub> O = Acyl-carrier protein + Hexadecanoicacid                                                           |
| R04666          | 3-Ureidoisobutyrate + H <sub>2</sub> O = 3-Aminoisobutyric acid + CO <sub>2</sub> + NH <sub>3</sub>                                       |

**Supplementary Table S2.** Discrepancies between the metabolic networks constructed using the MZ and YW methods. All reactions listed here are in the Ma and Zeng database (<http://www.ibiodesign.net/kneva/>) but not in the Wormflux database (<http://wormflux.umassmed.edu/>) and were used in the generation of the metabolic network. There is a total of 1203 reactions in the network, these represent about 1% of all reactions.
